# Supplementary material for: Studies in iridoid synthesis. Chemoselective transformations of cis-1,2,4,6-tetrahydrophthalic anhydride
Source: Royal Society of Chemistry journal article supplement (doi:10.1039/b716256a), 2007-12-20
Supplement: b716256a.pdf [file b716256a.pdf]

# STUDIES IN IRIDOID SYNTHESIS PART 1. CHEMOSELECTIVE TRANSFORMATIONS OF CIS-1,2,4,6-TETRAHYDROPHTHALIC ANHYDRIDE

Anne T. Stevens<sup>a</sup>, James R. Bull<sup>a</sup> and Kelly Chibale,<sup>\*a,b</sup>

<sup>a</sup> Department of Chemistry, University of Cape Town, Rondebosch 7701, South Africa. Fax: 27 21 689 7499; Tel: 27 21 650 2553; E-mail: Kelly.Chibale@uct.ac.za

<sup>b</sup> Institute of Infectious Disease and Molecular Medicine, University of Cape Town Medical School, Town, South Africa. Fax: 27 21 689 7499; Tel: 27 21 650 2553; E-mail: Kelly.Chibale@uct.ac.za

## 1. General Procedure

## 2. Synthetic Procedure and Characterization of 3, 5, 6-10.

### 1. GENERAL PROCEDURES

**Preparative** Reactions were monitored by thin layer chromatography using Merck F254 aluminium-backed precoated silica gel plates. Developed plates were visualised with a combination of ultraviolet, iodine vapour and either anisaldehyde or ceric ammonium sulfate solutions. Work-up typically involved threefold extraction with an organic solvent. The extracts were combined to give the organic phase. Column chromatography was performed using Merck Kieselgel 60: 70—230 mesh for gravity columns and 230—400 mesh for flash chromatography. Cycloadditions were performed in purpose made thick walled glass tubes fitted with a pressure valve and surrounded by a steel sheath during reactions. Diethyl ether and tetrahydrofuran (THF) were distilled from sodium-benzophenone ketyl, dichloromethane from phosphorous pentoxide and toluene from sodium. Other reagents and solvents were purified according to standard procedures.

**Analytical** Melting points were determined using a Reichert-Jung ThermoVar hot-stage microscope and are uncorrected. Optical rotations were measured on a Perkin-Elmer 141 Polarimeter using chloroform solutions. Infrared spectra were recorded as solutions in chloroform on a Paragon 1000 FT-IR Spectrometer. <sup>1</sup>H NMR spectra were recorded on a Varian VXR-200 at 200 MHz, Varian Mercury 300 MHz or Varian Unity spectrometer at 400 MHz. <sup>13</sup>C spectra were recorded on the same instruments operating at 50, 75 and 100 MHz respectively. All spectra were recorded in deuteriochloroform, using CHCl<sub>3</sub>, δ 7.26 as an internal standard. All chemical shifts are reported in ppm. H<sub>A</sub> and H<sub>B</sub> have been used arbitrarily in the NMR assignments to distinguish diastereotopic protons. Elemental analyses were recorded using a Fison's Instruments Elemental Analyser EA1108. Mass spectra were recorded on a VG micromass 16F spectrometer. In the absence of elemental analyses on oils and gums, accurate mass determinations were performed on a Kratos Limited MS9/50 spectrometer. All mass spectral data were obtained using Electron Impact techniques unless otherwise stated.

## 2. Synthetic Procedure and Characterization of 3, 5, 6-10.

### 2.1 (3aR\*, 7aS\*)-3a,4,7a-Tetrahydro-3H-isobenzofuran-1-one (3)

A solution of *cis*-1,2,4,6-tetrahydrophthalic anhydride **4** (15.2 g, 100 mmol) in dry *N,N*-dimethylformamide (50 cm<sup>3</sup>) was added dropwise over a period of 2 h to a stirred solution of sodium borohydride (3.0 g, 80 mmol) in dry *N,N*-dimethylformamide (50 cm<sup>3</sup>) at 0 °C. Water (5 cm<sup>3</sup>) was added and the solvent was removed under reduced pressure. The residue was treated with 2 M H<sub>2</sub>SO<sub>4</sub> (200 cm<sup>3</sup>) and, after standing for 16 h, was extracted with ethyl acetate. The extract was dried (MgSO<sub>4</sub>), and the solvent was removed under reduced pressure. The residue was purified by vacuum distillation to give the lactone **3** (7.7 g, 56%), bp 76—78 °C at 0.1 mm Hg (lit., 128—130 °C at 2.8 mm Hg);  $\nu_{\max}(\text{CHCl}_3)/\text{cm}^{-1}$  1771 (CO);  $\delta_{\text{H}}$  (200 MHz, CDCl<sub>3</sub>) 1.70—1.95 (1H, m, 3a-H), 2.15—2.70 (4H, m, 4-H<sub>2</sub> and 7-H<sub>2</sub>), 2.70—2.83 (1H, m, 7a-H), 4.00 (1H, dd, *J* 8.9 and 2.2 Hz, 3-H<sub>A</sub>) 4.30 (1H, dd, *J* 8.9 and 5.1 Hz, 3-H<sub>B</sub>) and 5.63—5.83 (2H, m, 5-H and 6-H);  $\delta_{\text{C}}$  (50 MHz, CDCl<sub>3</sub>) 22.0 (C-4), 24.7 (C-7), 31.9 (C-3a), 37.2 (C-7a), 72.7 (C-3), 124.8, 125.1 (C-5 and C-6) and 179.0 (C=O).

Flash chromatography of the distillation residue on silica gel (150 g) using ethyl acetate–hexane (2:3) afforded a further 3.0 g (22%) of **3**.

### 2.2 Methyl diisopropylammonium (1S\*, 2R\*)-cyclohex-4-ene-1,2-dicarboxylate (5)

Diisopropylamine (6.0 cm<sup>3</sup>, 42.8 mmol) was added to a stirred solution of *cis*-1,2,4,6-tetrahydrophthalic anhydride **4** (6.08 g, 40.0 mmol) in methanol (200 cm<sup>3</sup>). The resulting solution was stirred at 25 °C for 90 min. The solvent was removed *in vacuo* to give a solid residue (11.5 g). Recrystallisation from ethyl acetate–hexane yielded the ammonium salt **5** (9.70 g, 85%), mp 81—83 °C;  $\nu_{\max}(\text{CHCl}_3)/\text{cm}^{-1}$  3025 (NH<sub>2</sub><sup>+</sup>), 1726 (CO ester), 1556 (CO carboxylate);  $\delta_{\text{H}}$  (200 MHz, CDCl<sub>3</sub>) 1.22 [12H, d, *J* 6.5 Hz, 2 x CH(CH<sub>3</sub>)<sub>2</sub>], 2.15—2.70 (4H, m, 3-H<sub>2</sub> and 6-H<sub>2</sub>), 2.72—3.00 (2H, m, 1-H and 2-H), 3.13 [2H, sept, *J* 6 x 6.5 Hz, 2 x CH(CH<sub>3</sub>)<sub>2</sub>], 3.60 (3H, s, CO<sub>2</sub>CH<sub>3</sub>), 5.50—5.72 (2H, m, 4-H and 5-H) and 8.17 (2H, br. s, NH<sub>2</sub><sup>+</sup>);  $\delta_{\text{C}}$  (50 MHz, CDCl<sub>3</sub>) 19.2 (CH(CH<sub>3</sub>)<sub>2</sub>), 25.8 and 27.7 (C-3 and C-6), 40.2 and 41.7 (C-1 and C-2), 45.9 (CO<sub>2</sub>CH<sub>3</sub>), 51.1 (CH(CH<sub>3</sub>)<sub>2</sub>), 125.1 and 126.4 (C-4 and C-5), 175.3 and 178.1 (CO<sub>2</sub><sup>-</sup> and CO<sub>2</sub>CH<sub>3</sub>) (Found: C, 63.0; H, 9.8; N, 4.8. Calc. for C<sub>15</sub>H<sub>27</sub>N<sub>2</sub>O<sub>4</sub>: C, 63.0; H, 9.5; N, 4.9%).

### 2.3 (4R\*, 5S\*)-4,5-di(hydroxymethyl)cyclohexene (6):

Diisobutylaluminium hydride (1.5 M solution in toluene, 80 cm<sup>3</sup>, 120 mmol) was slowly added to a stirred solution of the lactone **3** (11.10 g, 80 mmol) in dry toluene (300 cm<sup>3</sup>) at –78 °C and the resulting solution was stirred for 1 h at –78 °C. The reaction was quenched with 3 M HCl (20 cm<sup>3</sup>) and the aqueous phase was adjusted to pH 2 by the addition of 1 M HCl. The aqueous phase was extracted with ethyl acetate, the combined organic extract was dried (MgSO<sub>4</sub>) and the solvent was removed under reduced pressure. Chromatography of the residue (13.50 g) on silica gel (400 g) using ethyl acetate–hexane (1:3) as eluent afforded the lactol **8** (8.10 g, 72%). Further elution with ethyl acetate yielded diol **6** (2.61 g, 23%),  $\delta_{\text{H}}$  (200 MHz, CDCl<sub>3</sub>) 1.80—2.20 (6H, m, 3-H<sub>2</sub>, 4-H, 5-H and 6-H<sub>2</sub>), 3.45—3.68 (4H, m, 2 x CH<sub>2</sub>OH), 3.95—4.35 (2H, br.s, 2 x CH<sub>2</sub>OH), 5.47—5.60 (2H, m, 1-H and 2-H).

### 2.4 Methyl hydrogen (1S\*, 2R\*)-cyclohex-4-ene-1,2-dicarboxylate (7)

a) The salt **5** (6.30 g, 22.1 mmol) was added to a stirred mixture of ethyl acetate–water (50:50). 1 M HCl was added dropwise until pH 3 was reached. The aqueous phase was extracted with ethyl acetate, dried (MgSO<sub>4</sub>) and the solvent was removed under reduced pressure to give a residue (3.91 g). Recrystallisation from acetone–hexane furnished the half ester **7** (3.66 g, 90%), mp 81—83 °C (lit.,<sup>34</sup> 81.2—83.1 °C);  $\nu_{\max}(\text{CHCl}_3)/\text{cm}^{-1}$  1736 (CO ester), 1714 (CO acid);  $\delta_{\text{H}}$  (200 MHz, CDCl<sub>3</sub>) 2.20—2.68 (4H, m, 3-H<sub>2</sub> and 6-H<sub>2</sub>), 2.98—3.07 (2H, m, 1-H and 2-H), 3.69 (3H, s, CO<sub>2</sub>CH<sub>3</sub>) and 5.54—5.78 (2H, s, 4-H and 5-H).

b) Potassium carbonate (0.70 g, 5.1 mmol) was added to a stirred solution of *cis*-1,2,4,6-tetrahydrophthalic anhydride (1.52 g, 10.0 mmol) in methanol (60 cm<sup>3</sup>). The resulting mixture was stirred at 25 °C for 16 h. The solvent was removed under reduced pressure and the resulting oil was dissolved in ethyl acetate (100 cm<sup>3</sup>). This solution was acidified to pH 4 with 1 M HCl and the aqueous phase was extracted with ethyl acetate. The organic extract was washed with brine, dried

(MgSO<sub>4</sub>) and the solvent was removed under reduced pressure to give a residue (0.98 g). Recrystallisation from acetone–hexane gave **7** (0.90 g, 49%), mp 82–83 °C.

### 2.5 (3aR\*, 7aS\*)-3a,4,7,7a-Tetrahydro-3H-isobenzofuran-1-ol (**8**)

a) Diisobutylaluminium hydride (1.5 M solution in toluene, 5.3 cm<sup>3</sup>, 8.0 mmol) was added in one portion to a stirred solution of the lactone **3** (1.00 g, 7.2 mmol) in dry toluene (30 cm<sup>3</sup>) at –78 °C and the resulting solution was stirred for 1 h at –78 °C. Then HCl (3 M, 2 cm<sup>3</sup>) was added to the reaction mixture which was subsequently acidified to pH 2 by further addition of 1 M HCl. The aqueous phase was extracted with ethyl acetate, the organic extract was dried (MgSO<sub>4</sub>) and the solvent was removed under reduced pressure. The resulting oil (1.12 g) was chromatographed on silica gel (400 g) using ethyl acetate–hexane (1:3) as eluent afforded the lactol **8** (0.93 g, 92%), as an inseparable mixture (~8:1 by NMR) of diastereomers,  $\nu_{\max}(\text{CHCl}_3)/\text{cm}^{-1}$  3601 (OH);  $\delta_{\text{H}}$  (200 MHz, CDCl<sub>3</sub>) *major* 1.64–2.09 (1H, m, 3a-H), 2.10–2.70 (4H, m, 4-H<sub>2</sub> and 7-H<sub>2</sub>), 2.55–7.5 (1H, m, 7a-H), 4.00 (1H, dd, *J* 8.9 and 2.2 Hz, 3-H<sub>A</sub>) 4.30 (1H, dd, *J* 8.9 and 5.1 Hz, 3-H<sub>B</sub>) and 5.72 (2H, m, 5-H, 6-H);  $\delta_{\text{C}}$  (50 MHz, CDCl<sub>3</sub>) 22.9 (C-4), 23.2 (C-7), 32.8 (C-3a), 41.3 (C-7a), 72.2 (C-3), 103.4 (C-1), 124.6 and 124.7 (C-5 and C-6).

b) Diisobutylaluminium hydride (1.5 M solution in toluene, 80 cm<sup>3</sup>, 120 mmol) was slowly added to a stirred solution of the lactone **3** (11.10 g, 80 mmol) in dry toluene (300 cm<sup>3</sup>) at –78 °C and the resulting solution was stirred for 1 h at –78 °C. The reaction was quenched with 3 M HCl (20 cm<sup>3</sup>) and the aqueous phase was adjusted to pH 2 by the addition of 1 M HCl. The aqueous phase was extracted with ethyl acetate, the combined organic extract was dried (MgSO<sub>4</sub>) and the solvent was removed under reduced pressure. Chromatography of the residue (13.50 g) on silica gel (400 g) using ethyl acetate–hexane (1:3) as eluent afforded the lactol **8** (8.10 g, 72%). Further elution with ethyl acetate yielded diol (4R\*, 5S\*)-4,5-di(hydroxymethyl)cyclohexene **6** (2.61 g, 23%),  $\delta_{\text{H}}$  (200 MHz, CDCl<sub>3</sub>) 1.80–2.20 (6H, m, 3-H<sub>2</sub>, 4-H, 5-H and 6-H<sub>2</sub>), 3.45–3.68 (4H, m, 2 x CH<sub>2</sub>OH), 3.95–4.35 (2H, br.s, 2 x CH<sub>2</sub>OH), 5.47–5.60 (2H, m, 1-H and 2-H).

### 2.6 (4R\*, 5R\*)-4-Hydroxymethyl-5-vinylcyclohexene (**9**)

*n*-Butyllithium (2.5 M solution in hexane, 8.6 cm<sup>3</sup>) was added to a stirred slurry of methyltriphenylphosphonium iodide (8.65 g, 21.4 mmol) in tetrahydrofuran (40 cm<sup>3</sup>) at 0 °C. The resulting solution was warmed to 25 °C and stirred for 2 h. A solution of lactol **8** (0.93 g, 6.6 mmol) in tetrahydrofuran (20 cm<sup>3</sup>) was slowly added and the mixture was stirred for 30 min at 25 °C. 1 M HCl (100 cm<sup>3</sup>) was added and the mixture was extracted with ethyl acetate. The organic extract was dried (MgSO<sub>4</sub>) and the solvent was removed under reduced pressure to give a yellow residue (1.02 g). Chromatography on silica gel (100 g) using ethyl acetate–hexane (1:4) as eluent yielded the vinyl alcohol **9** (0.81 g, 89%),  $\nu_{\max}(\text{CHCl}_3)/\text{cm}^{-1}$  3620 (OH);  $\delta_{\text{H}}$  (300 MHz, CDCl<sub>3</sub>) 1.66 (1H, br.s, OH), 1.79–2.12 (4H, m, 3-H<sub>2</sub>, 4-H and 6-H<sub>A</sub>), 2.23–2.33 (1H, m, 6-H<sub>B</sub>), 2.54–2.63 (1H, m, 5-H) 3.48 (1H, dd, *J* 10.6 and 6.5 Hz, 1'-H<sub>A</sub>), 3.56 (1H, dd, *J* 10.6 and 6.8 Hz, 1'-H<sub>B</sub>), 5.04 (1H, ddd, *J* 10.3, 2.1 and 0.9 Hz, 2''-H<sub>A</sub>), 5.08 (1H, ddd, *J* 17.2, 2.1 and 1.2 Hz, 2''-H<sub>B</sub>), 5.60–7.57 (2H, m, 1-H and 2-H) and 5.87 (1H, ddd, *J* 17.2, 10.3 and 8.5 Hz, 1''-H);  $\delta_{\text{C}}$  (75 MHz, CDCl<sub>3</sub>) 25.6 (C-3), 30.1 (C-6), 38.2 (C-5), 39.2 (C-4), 64.8 (C-1'), 115.2 (C-2''), 125.4 and 125.6 (C-1 and C-2) and 139.3 (C-1'').

### 2.7 (1R\*, 6R\*)-6-Vinyl-3-cyclohexene-1-carbaldehyde (**10**)

Dimethyl sulfoxide (0.33 cm<sup>3</sup>, 0.36 g, 4.64 mmol) was added to a stirred solution of oxalyl chloride (0.20 cm<sup>3</sup>, 0.29 g, 2.32 mmol) in dichloromethane (3 cm<sup>3</sup>) at –78 °C. After 10 min a solution of **9** (320 mg, 2.32 mmol) in dichloromethane (2 cm<sup>3</sup>) was added and the solution was stirred for 30 min. Triethylamine (38 cm<sup>3</sup>, 1.48 g, 14.6 mmol) was added and the mixture was stirred for 45 min then warmed to 25 °C. Saturated aqueous ammonium chloride was added and the mixture was extracted with dichloromethane. The organic extract was washed with brine, dried (MgSO<sub>4</sub>) and the solvent was removed under reduced pressure to give a liquid (351 mg). Flash chromatography on silica gel (30 g) using ethyl acetate–hexane (1:9) as eluent afforded the aldehyde **10** (116 mg, 37%),  $\delta_{\text{H}}$  (400 MHz, CDCl<sub>3</sub>) 2.02–2.70 (4H, m, 1-H, 2-H<sub>2</sub>, and 5-H<sub>A</sub>), 2.55–2.70 (1H, m, 5-H<sub>B</sub>), 2.84–2.99 (1H, m, 6-H) 5.08 (2H, m, 2''-H<sub>2</sub>), 5.60–7.57 (2H, m, 3-H and 4-H), 5.90 (1H, ddd, *J* 17.1, 10.5 and 7.6 Hz, 1''-H) and 9.69 (1H, d, *J* 1.2 Hz, 1'-H).
